# Supplementary material for: Design, synthesis, and enzyme kinetic evaluation of oxadiazole derivatives as nucleoside triphosphate diphosphohydrolase (NTPDase) inhibitors: an integrated in vitro and in silico approach
Source: Royal Society of Chemistry journal article supplement (doi:10.1039/d6ra01543c), 2026-04-27
Supplement: d6ra01543c1.pdf [file d6ra01543c1.pdf]

## Supporting Information

### **Design, Synthesis, and Enzyme Kinetic Evaluation of Oxadiazole Derivatives as Nucleoside Triphosphate Diphosphohydrolase (NTPDase) Inhibitors: An Integrated *In Vitro* and *In Silico* Approach**

Syed Zaighum Abbas<sup>1</sup>, Zaman Ashraf<sup>2, \*</sup>, Sadia Roshan<sup>3</sup>, Kalsoom Sughra<sup>4</sup>, Muhammad Arslan Rahat<sup>5</sup>, Imran Shakir<sup>6, \*</sup>, Muhammad Latif<sup>2, 7, 8\*</sup>

<sup>1</sup>Department of Chemistry, Allama Iqbal Open University, Islamabad-44000, Pakistan; [realzaghham@hotmail.com](mailto:realzaghham@hotmail.com) (S.Z.A.)

<sup>2</sup>Department of Chemistry, Rawalpindi Women University, Rawalpindi-46300 Pakistan; [zaman.ashraf@rwu.edu.pk](mailto:zaman.ashraf@rwu.edu.pk) (Z.A.)

<sup>3</sup>Department of Zoology, University of Gujrat, Gujrat-50700, Pakistan; [sadia.roshan@uog.edu.pk](mailto:sadia.roshan@uog.edu.pk) (S.R.)

<sup>4</sup>Department of Biochemistry and Biotechnology, University of Gujrat, Gujrat 50700, Pakistan; [sughra@uog.edu.pk](mailto:sughra@uog.edu.pk) (K.S.)

<sup>5</sup>Department of Chemistry, University of Massachusetts, Amherst, Massachusetts 01003, United States; [mrahat@umass.edu](mailto:mrahat@umass.edu) (M.A.R.)

<sup>6</sup>Department of Physics, Faculty of Science, Islamic University of Madinah, Madinah, 42351, Saudi Arabia; [imranskku@gmail.com](mailto:imranskku@gmail.com) (I.S.)

<sup>7</sup>Centre for Genetics and Inherited Diseases (CGID), Taibah University, Madinah, Saudi Arabia; [mmuradkhan@taibahu.edu.sa](mailto:mmuradkhan@taibahu.edu.sa) (M.L.)

<sup>8</sup>Department of Basic Medical Sciences, College of Medicine, Taibah University, Madinah, Saudi Arabia; [mmuradkhan@taibahu.edu.sa](mailto:mmuradkhan@taibahu.edu.sa) (M.L.)

\*Correspondence: [zaman.ashraf@rwu.edu.pk](mailto:zaman.ashraf@rwu.edu.pk) (Z.A.); [mmuradkhan@taibahu.edu.sa](mailto:mmuradkhan@taibahu.edu.sa) (M.L.); Telephone: +923484038134 (M.L.)

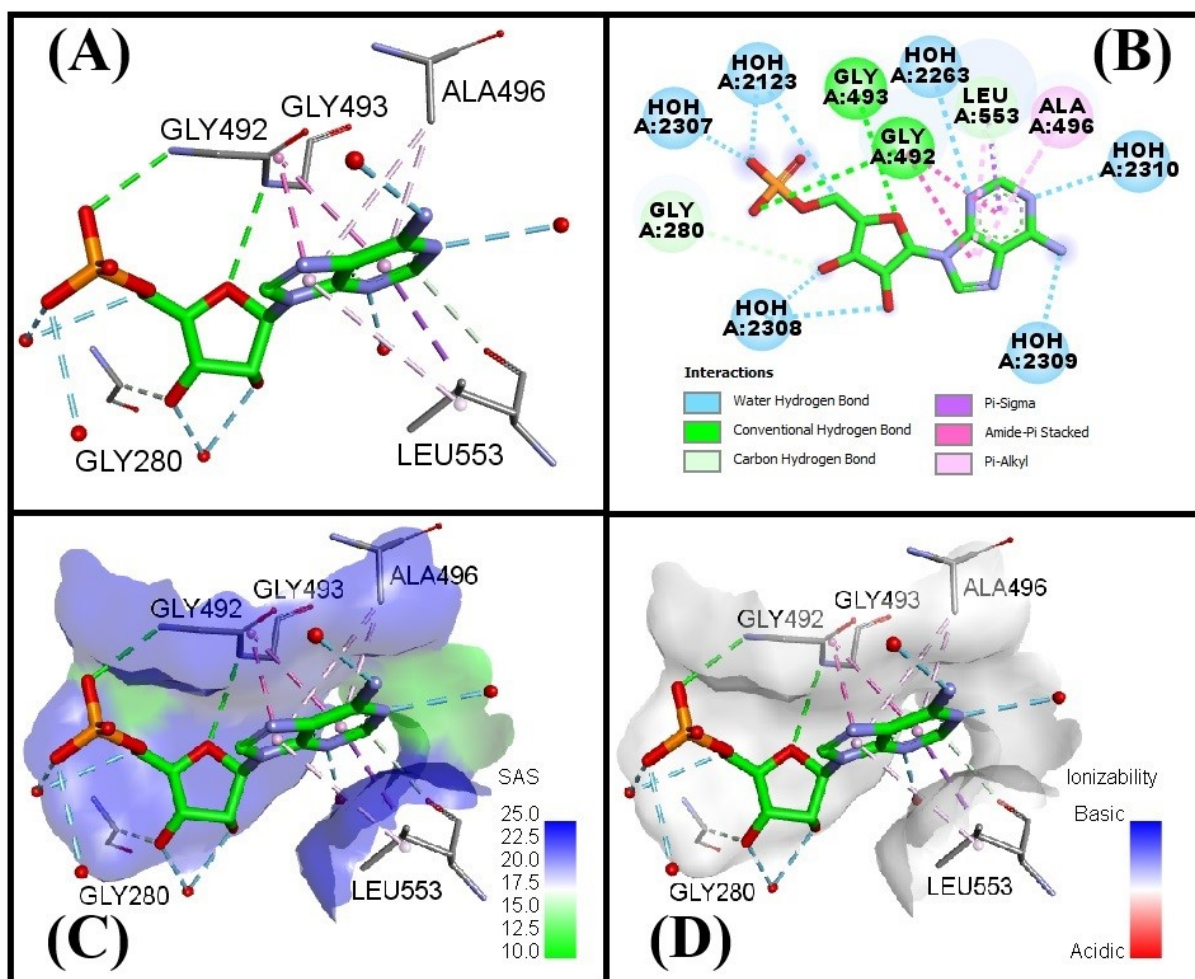

**Figure S1.** Binding pocket analysis for NTPDase3 containing co-crystallized ligand **Amp700** (green); **(A)** 3D diagram for ligand's interaction, **(B)** 2D diagram for ligand interactions, **(C)** Solvent accessibility surface, **(D)** Ionizability surface.

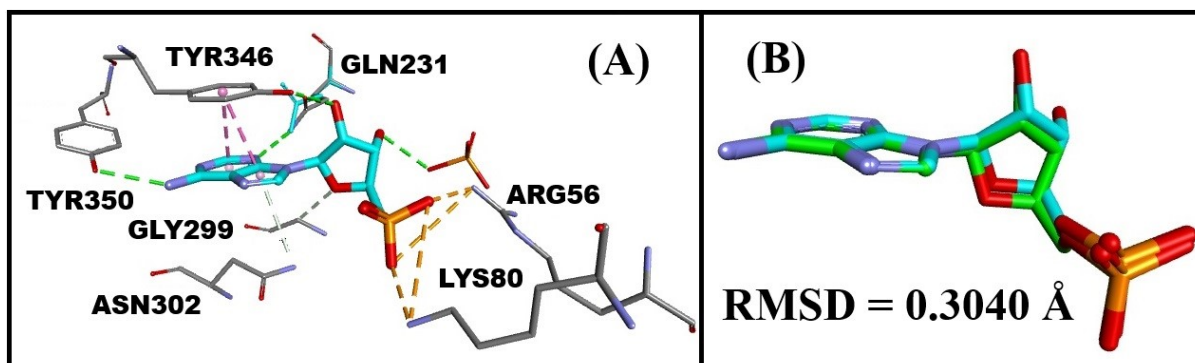

**Figure S2.** Docking validation for NTPDase1 (A) 3D diagram for redocked ligand **Amp** (cyan) (B) Determination of RMSD using co-crystallized (green) and redocked (cyan) **Amp** ligand.

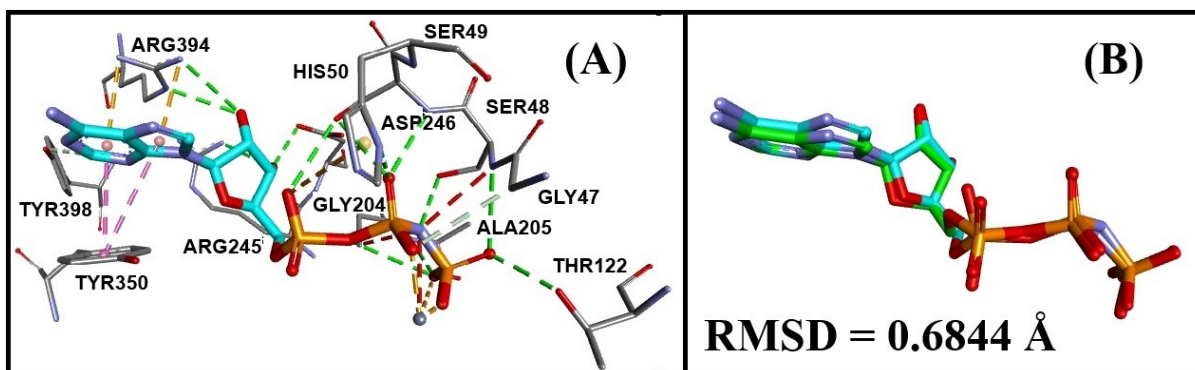

**Figure S3.** Docking validation for NTPDase2 (A) 3D diagram for redocked ligand **Anp** (cyan) (B) Determination of RMSD using co-crystallized (green) and redocked (cyan) **Anp** ligand.

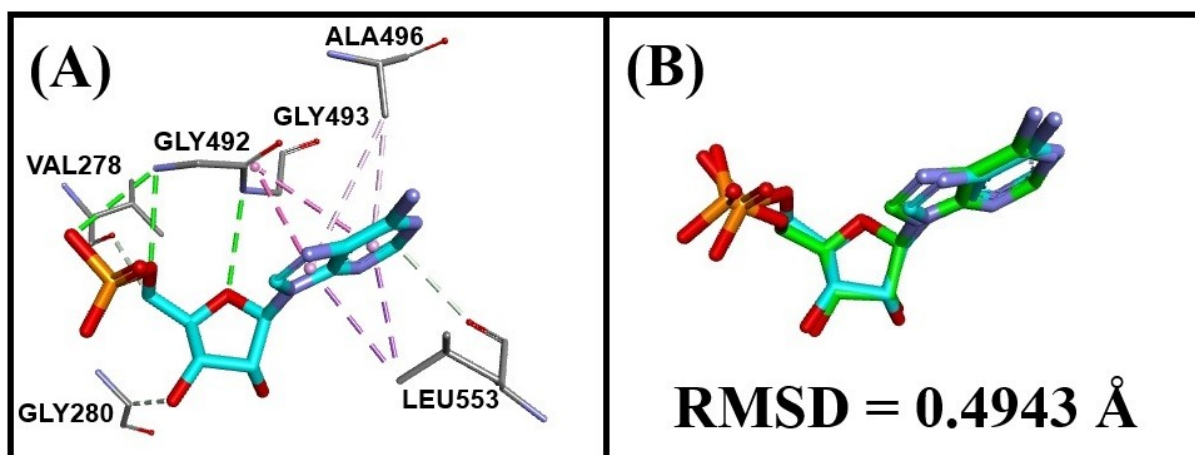

**Figure S4.** Docking validation for NTPDase3 (A) 3D diagram for redocked ligand **Amp** (cyan) (B) Determination of RMSD using co-crystallized (green) and redocked (cyan) **Amp** ligand.

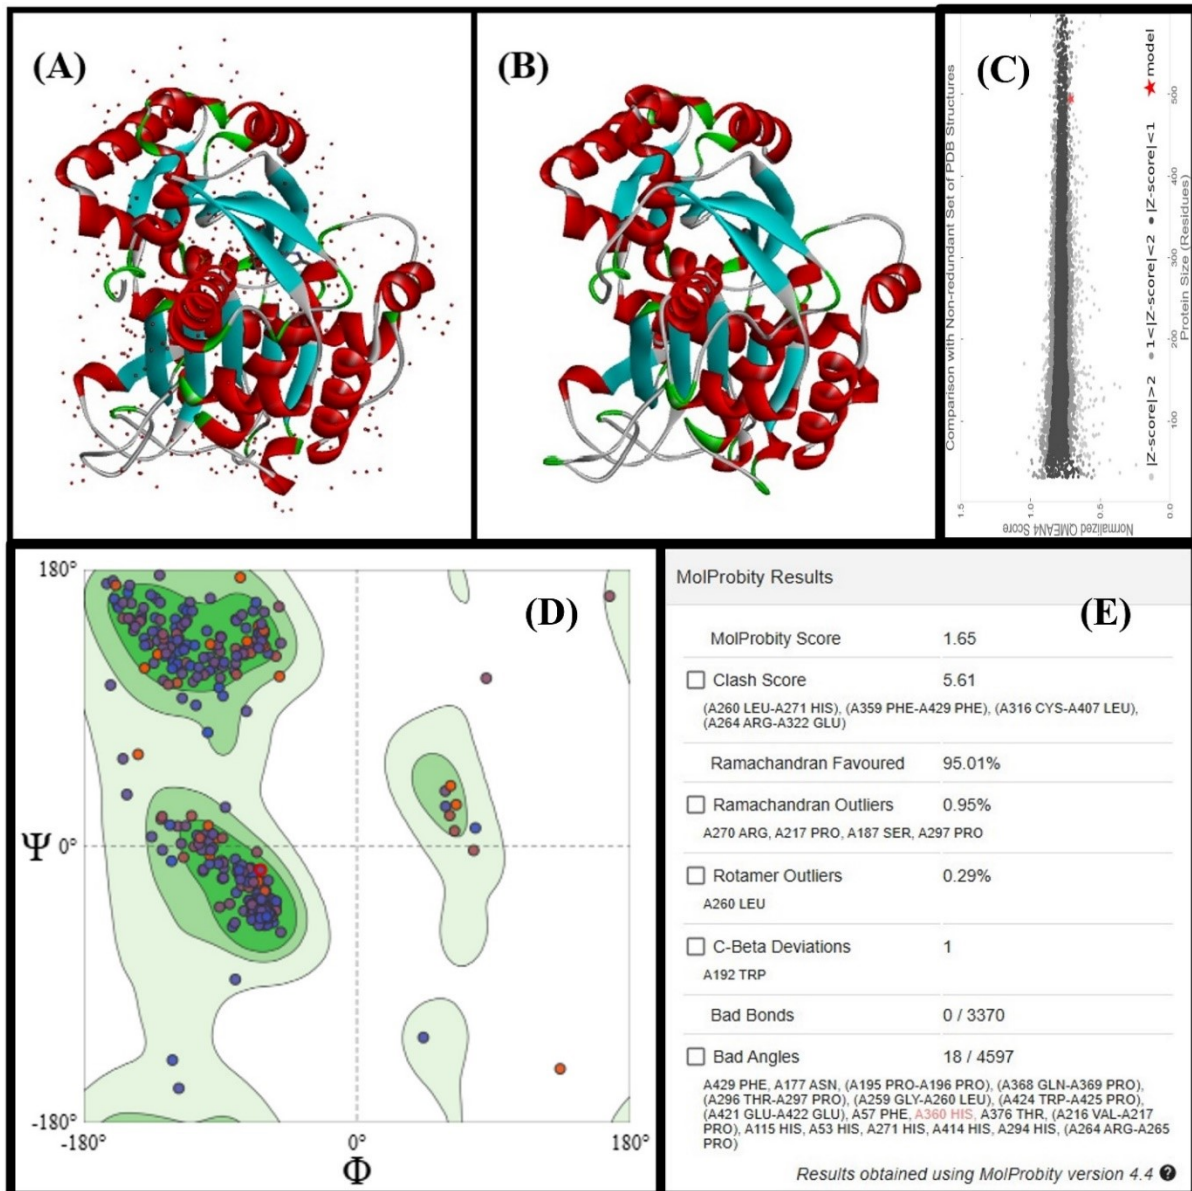

**Figure S5.** Homology modelling: **(A)** 3CJ9 (NTPDase2) selected for homology modelling, **(B)** NTPDase8 acquired as a homology model, **(C)** Z score, **(D)** Ramachandran plot, **(E)** MolProbity results for the reliability of the homology model.

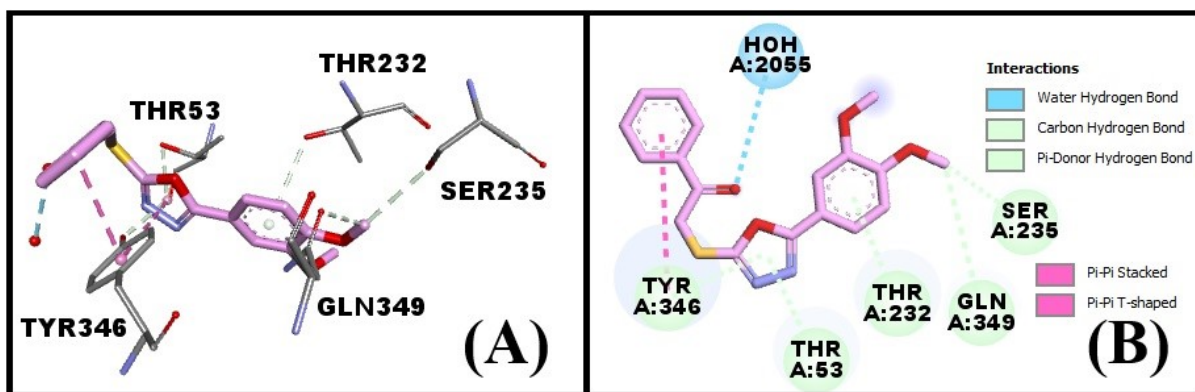

**Figure S6.** The ligand **7g** (pink) docked on NTPDase1 (4BRQ); **(A)** 3D interactions, **(B)** 2D interactions.

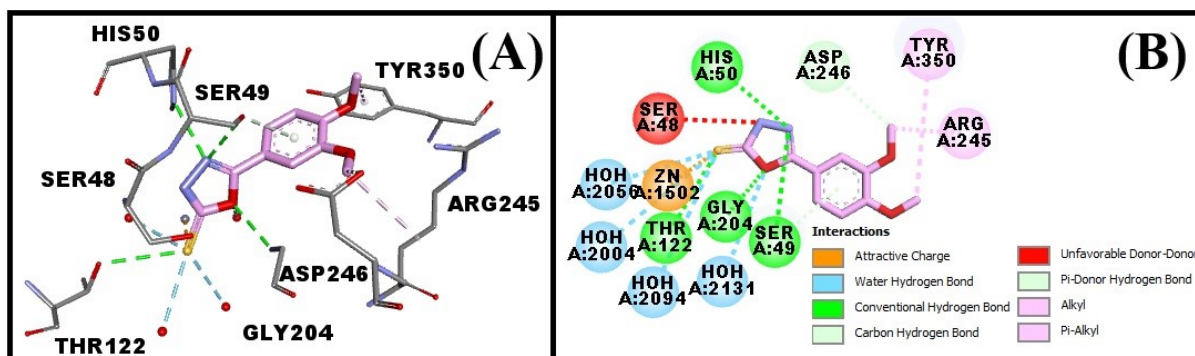

**Figure S7.** The ligand 4 (Thiol, pink) docked on NTPDase2 (4BR5); (A) 3D interaction, (B) 2D interaction.

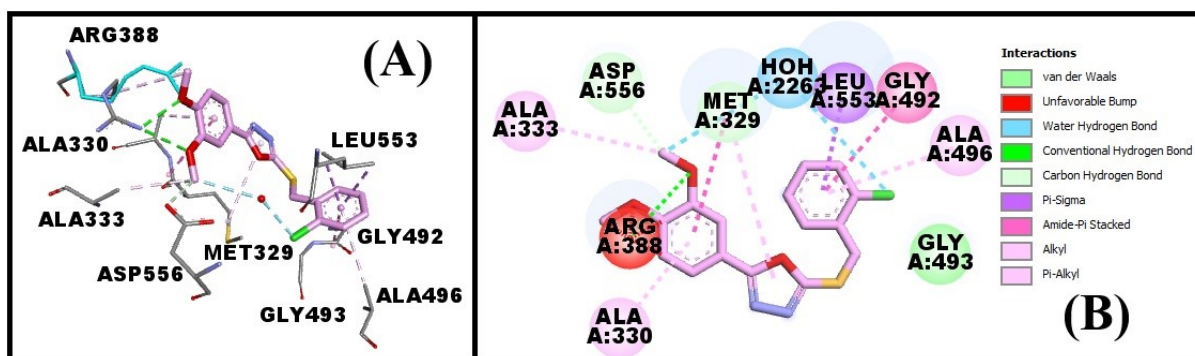

**Figure S8.** The ligand **7d** (pink) docked on NTPDase3 (4A59); **(A)** 3D interaction, **(B)** 2D interaction.

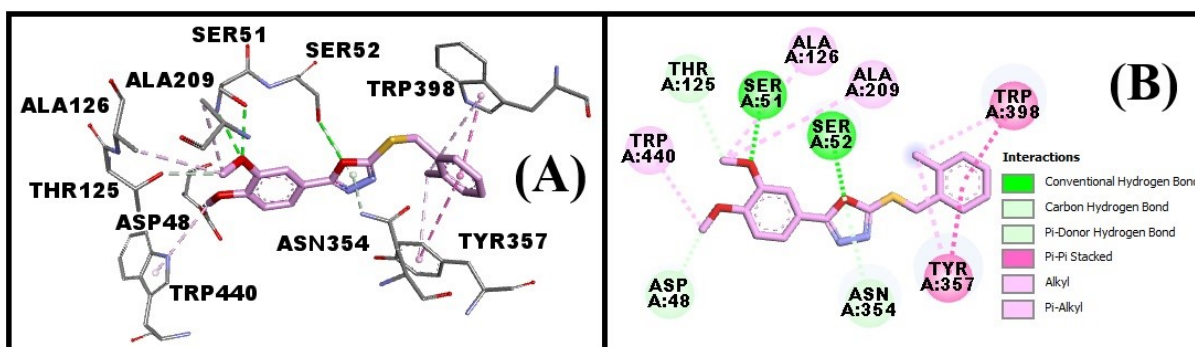

**Figure S9.** Ligand **7c** (pink) docked on NTPDase8; (A) 3D interaction, (B) 2D interaction. There was no redocked standard used for NTPDase 8, as it was acquired from homology modelling. The **7a-7g** series derivatives, especially **7c**, **7d**, and **7f**, could serve as promising candidates for further refinement and biological testing against NTPDase8.

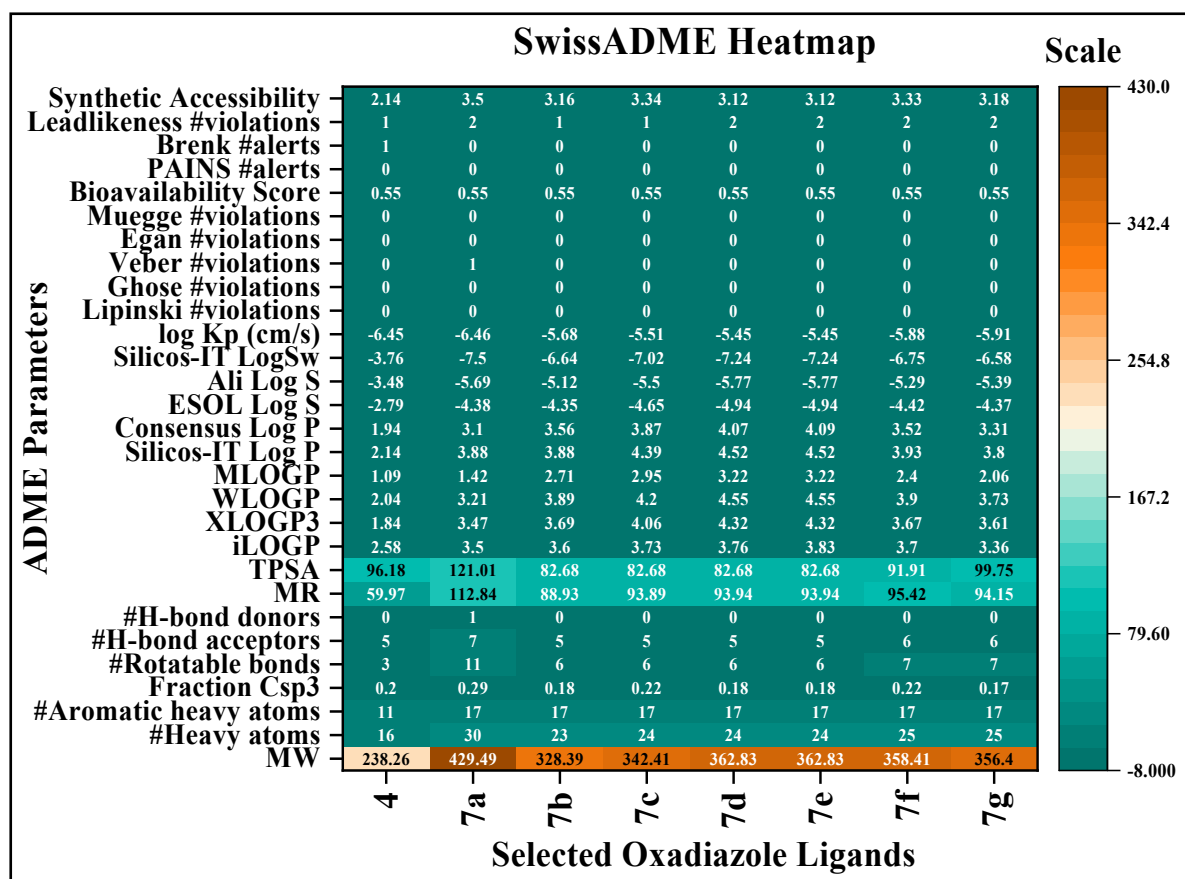

**Figure S10.** Heat Map for SwissADME Parameters of the Oxadiazole Compounds.

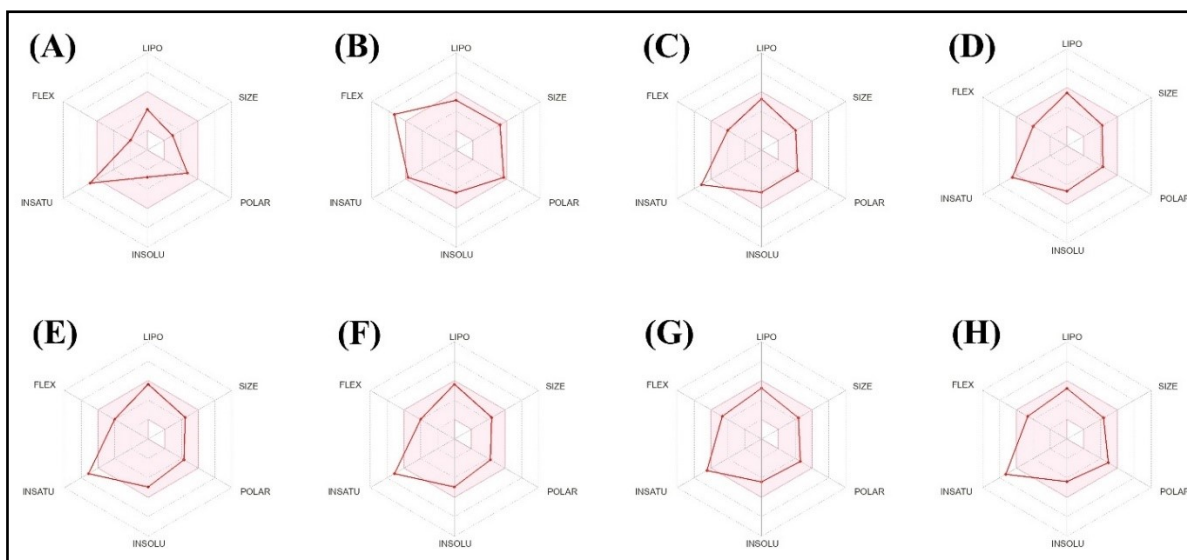

**Figure S11.** Spiderweb plots for the Oxadiazole Compounds; (A) 4, (B) 7a, (C) 7b, (D) 7c, (E) 7d, (F) 7e, (G) 7f, (H) 7g.

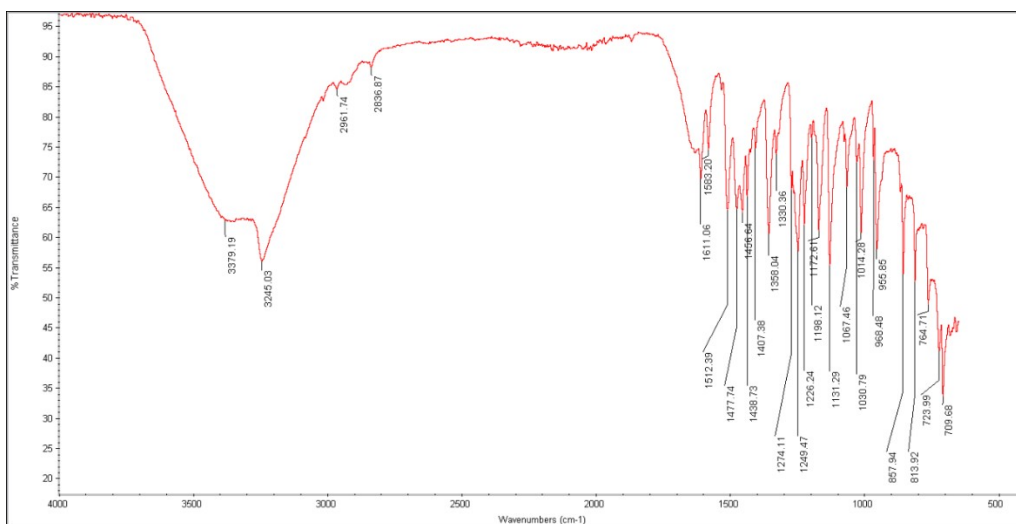

2025-07-14 BO-1 H-NMR 1.fid  
2025-07-14 BO-1 H-NMR

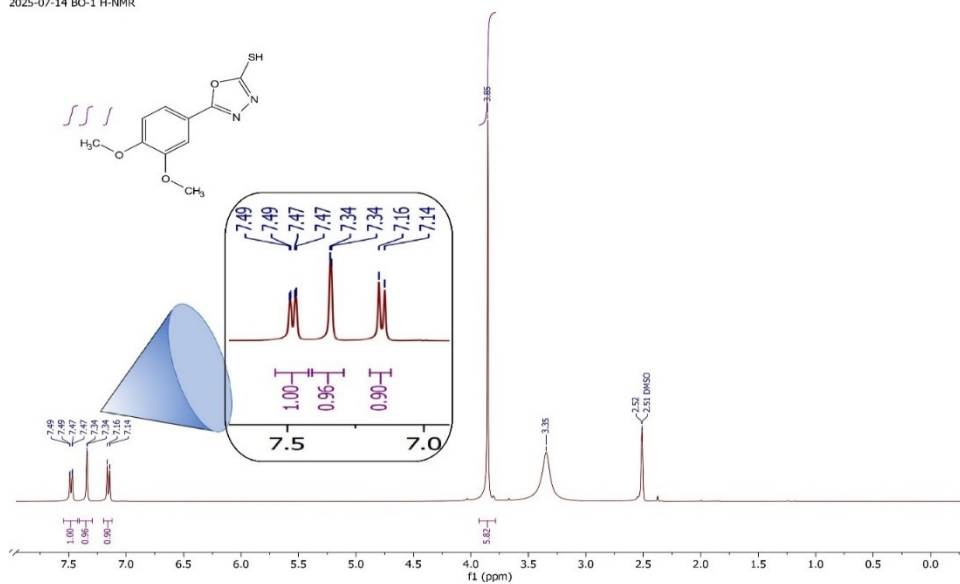

BO-1 C-13 NMR 1.fid  
BO-1 C-13 NMR

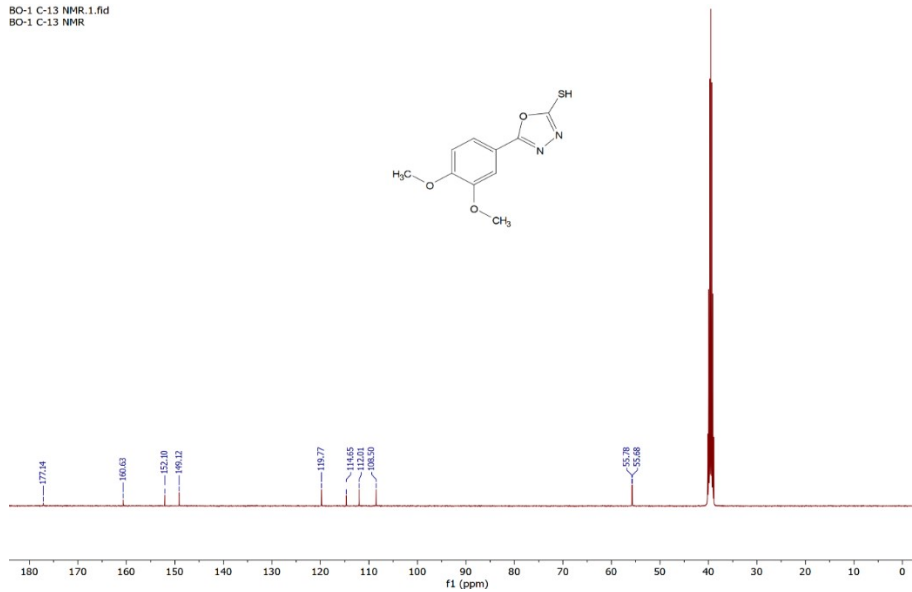

Figure S12: FT-IR, <sup>1</sup>H-, and <sup>13</sup>C-NMR spectra of compound 4.

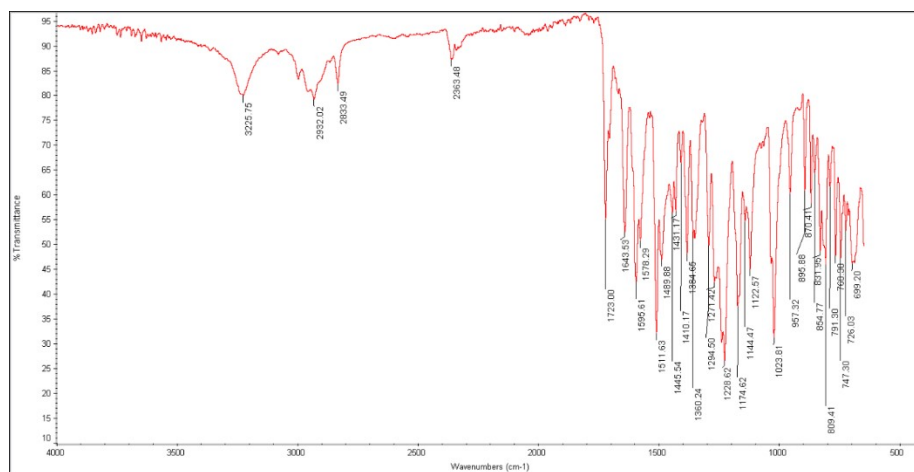

2025-08-09 (73) FBO-7.1.fid  
2025-08-09 (73) FBO-7

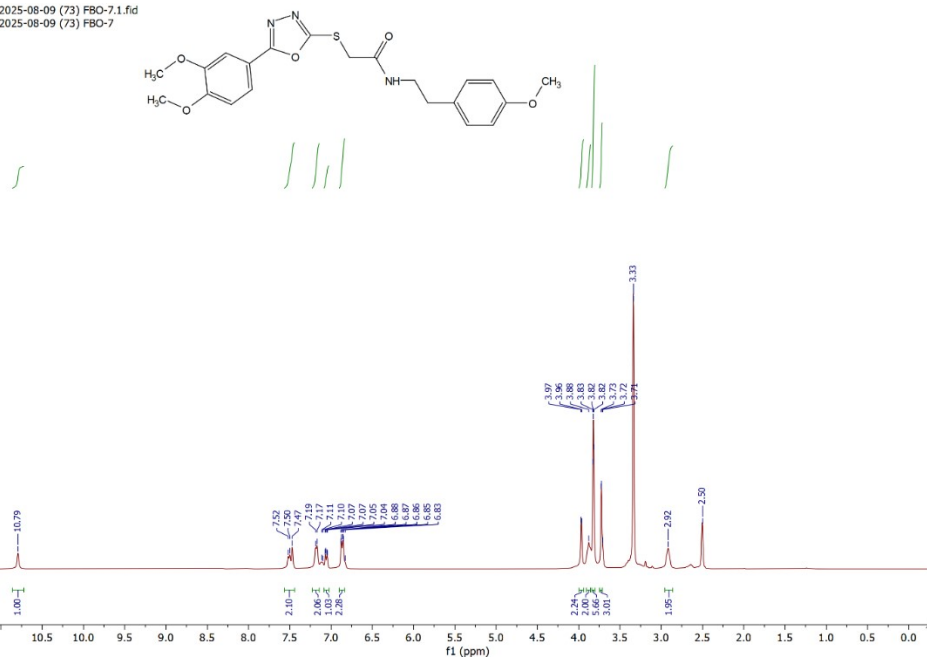

2025-08-09 (73) FBO-7 C-13.1.fid  
2025-08-09 (73) FBO-7 C-13

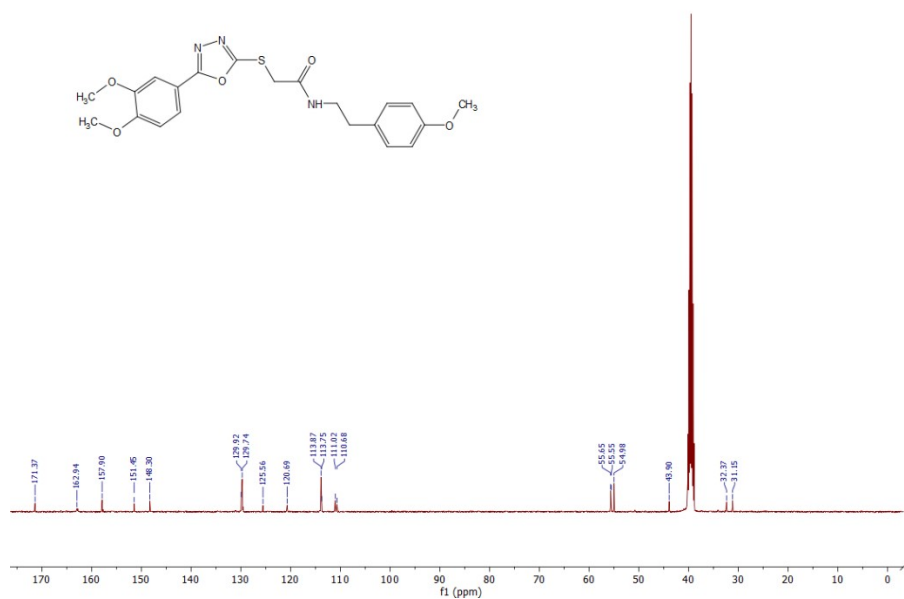

**Figure S13:** FT-IR,  $^1\text{H}$ -, and  $^{13}\text{C}$ -NMR spectra of compound **7a**.

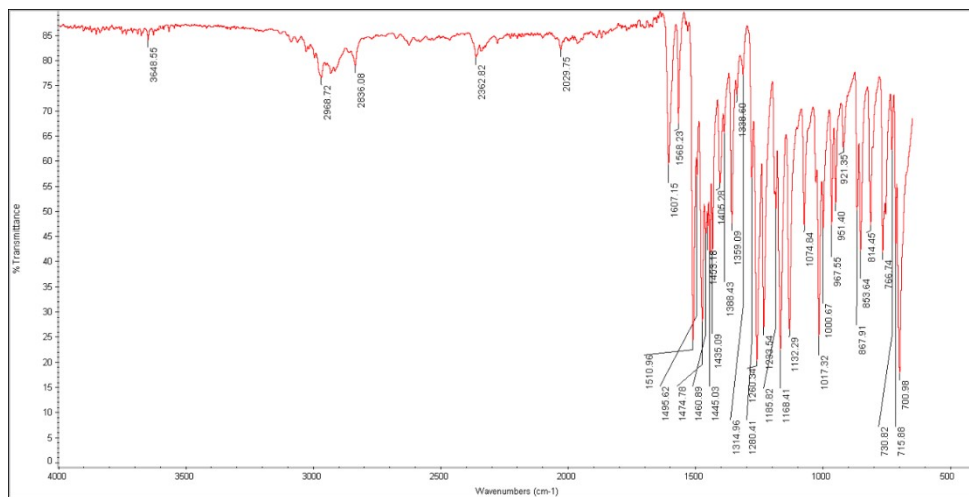

2025-07-19 (71).1.fid  
2025-07-19 (71)

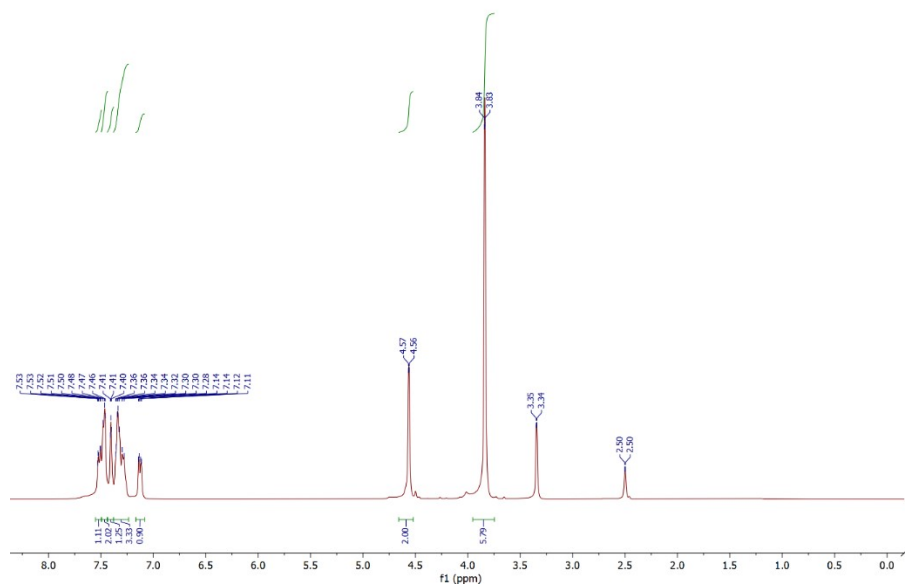

2025-07-19 FBO-10 (71) C-13.1.fid  
2025-07-19 FBO-10 (71) C-13

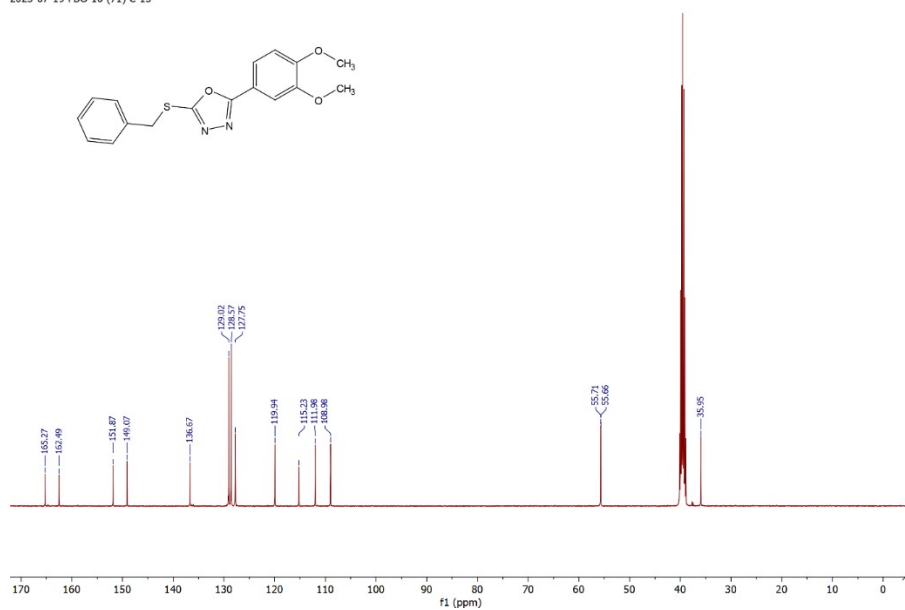

Figure S14: FT-IR, <sup>1</sup>H-, and <sup>13</sup>C-NMR spectra of compound 7b.

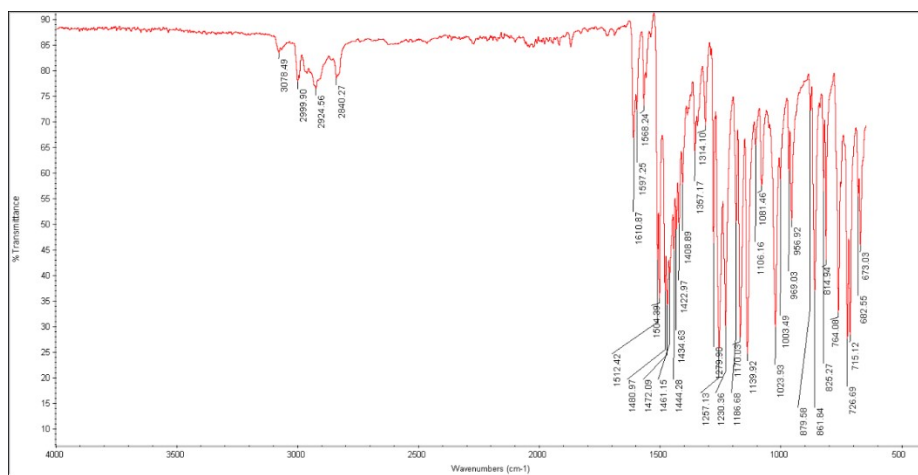

2025-08-09 (74) FBO-11.1.fid  
2025-08-09 (74) FBO-11

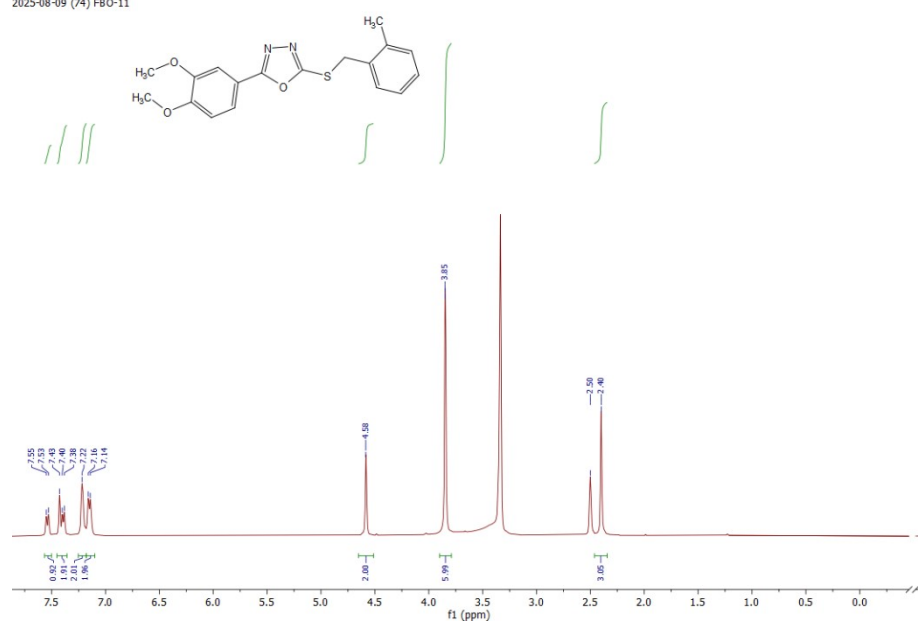

2025-08-09 (74) FBO-11 C-13.1.fid  
2025-08-09 (74) FBO-11 C-13

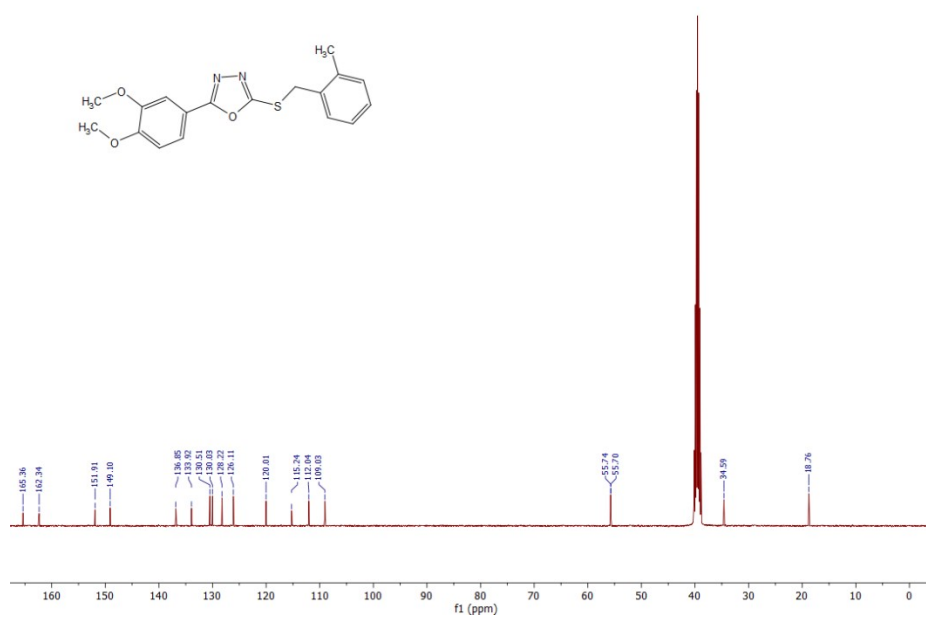

**Figure S15:** FT-IR,  $^1\text{H}$ -, and  $^{13}\text{C}$ -NMR spectra of compound 7c.

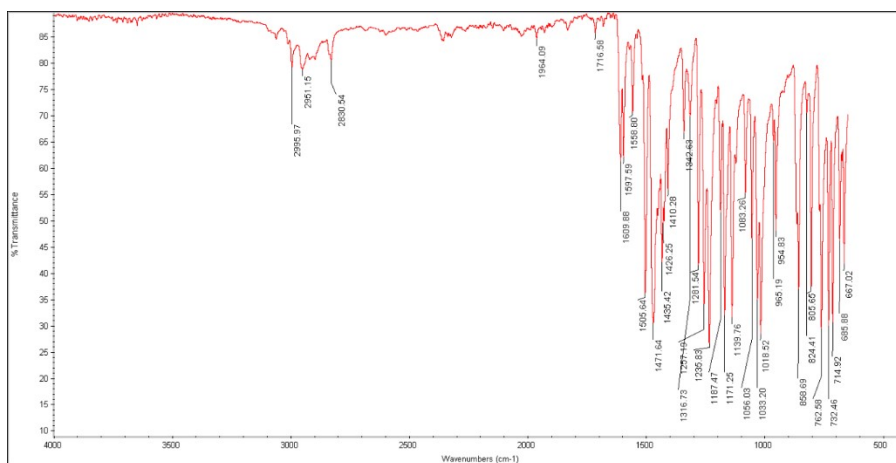

FB0-12 H-NMR.1.fid  
FB0-12 H-NMR

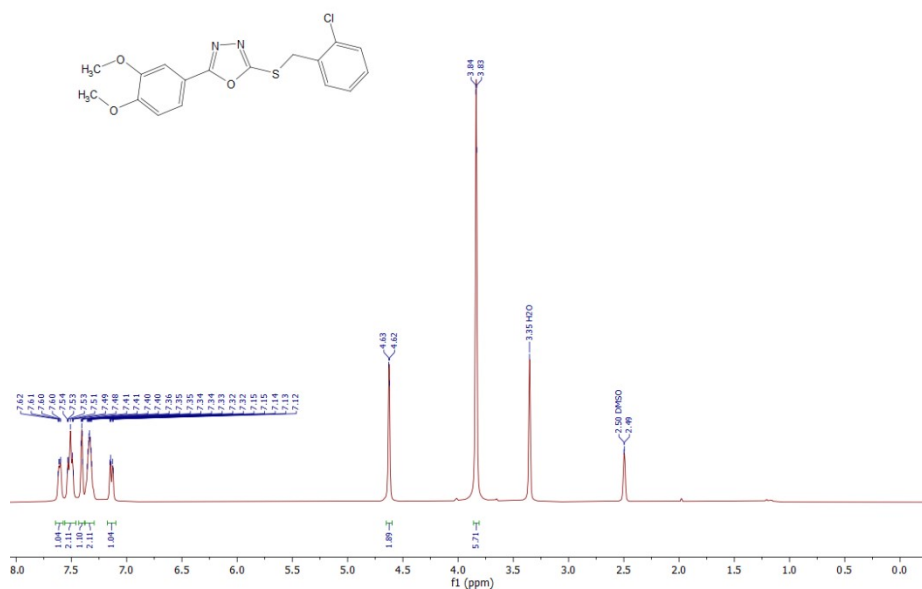

FB0-12 C-13.1.fid  
FB0-12 C-13

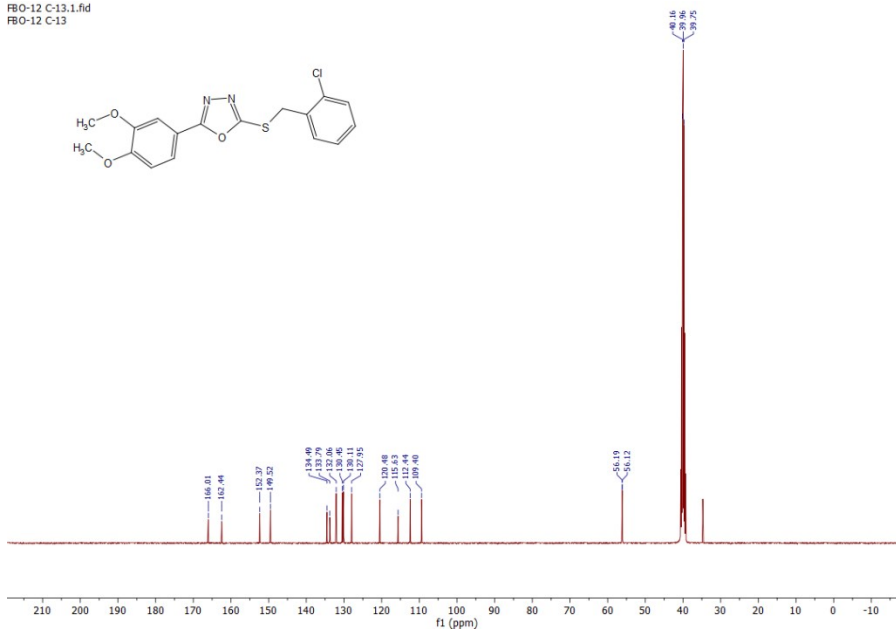

**Figure S16:** FT-IR,  $^1\text{H}$ -, and  $^{13}\text{C}$ -NMR spectra of compound **7d**.

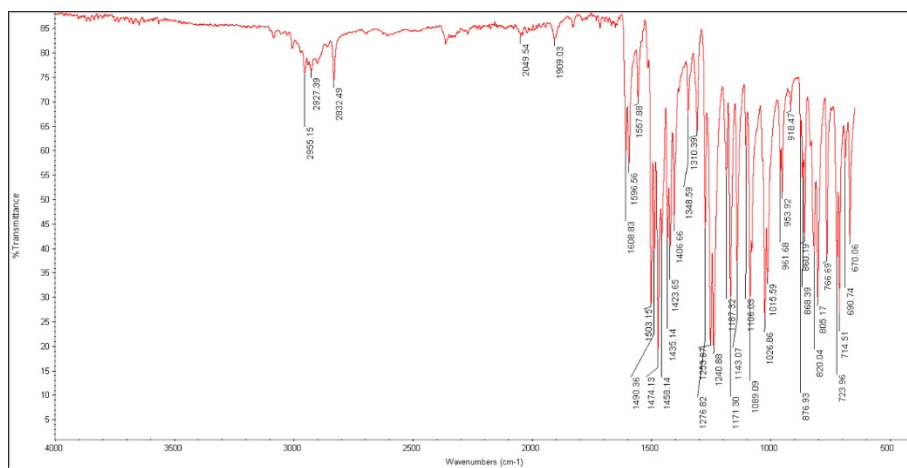

FB0-13 H-NMR.1.fid  
FB0-13 H-NMR

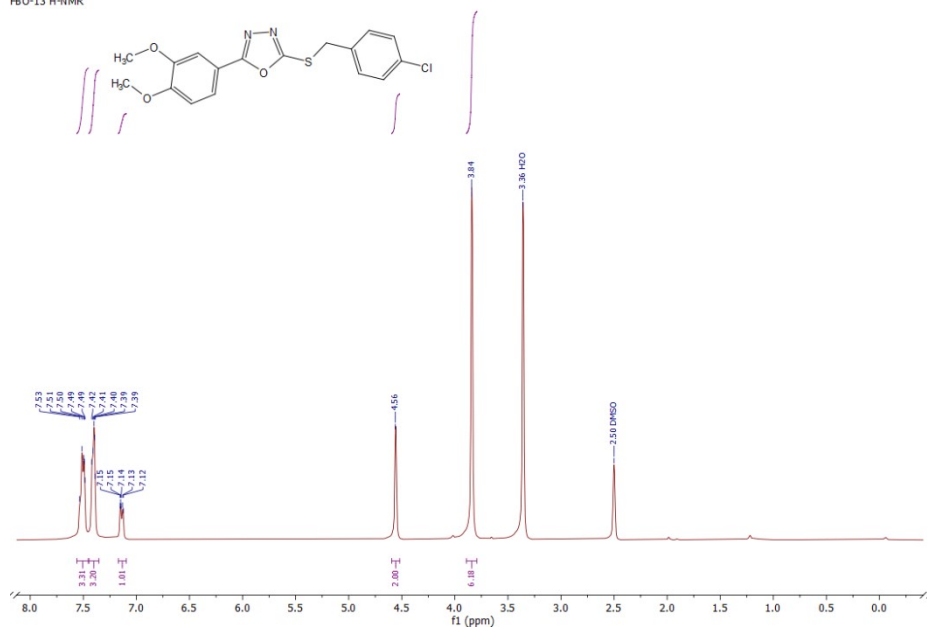

FB0-13 C-13.1.fid  
FB0-13 C-13

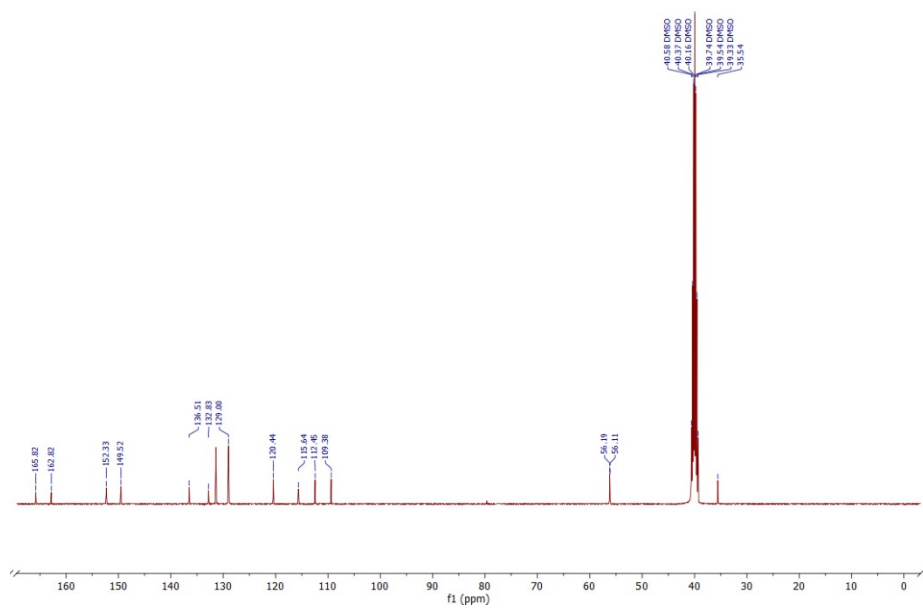

Figure S17: FT-IR, <sup>1</sup>H-, and <sup>13</sup>C-NMR spectra of compound 7e.

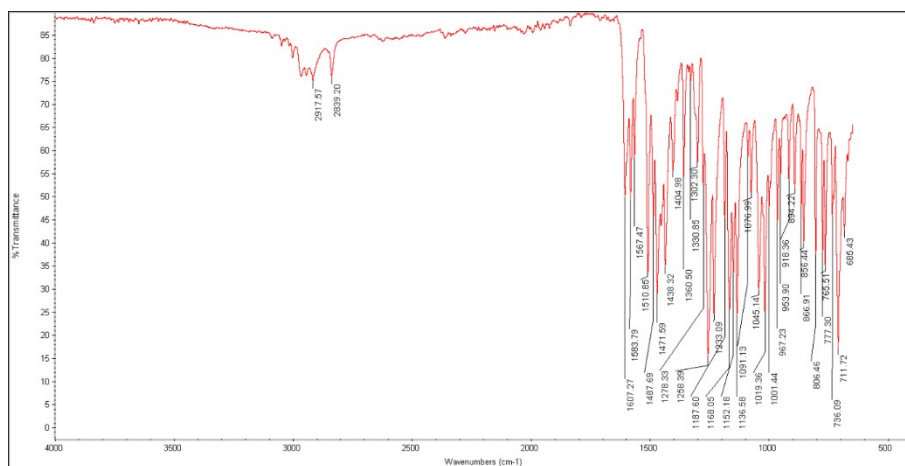

FBO-14 H-NMR.1.fid  
FBO-14 H-NMR

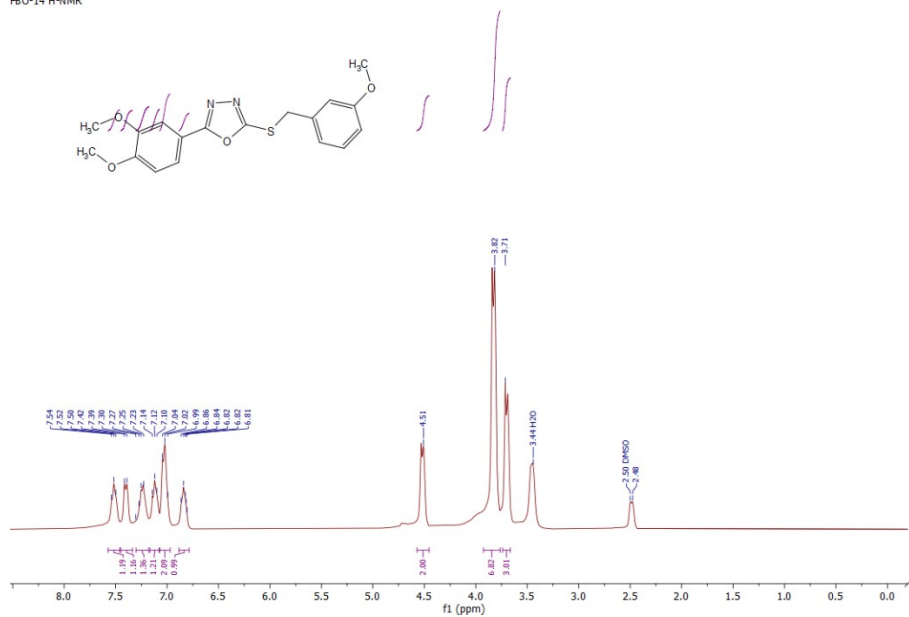

FBO-14 C-13.1.fid  
FBO-14 C-13

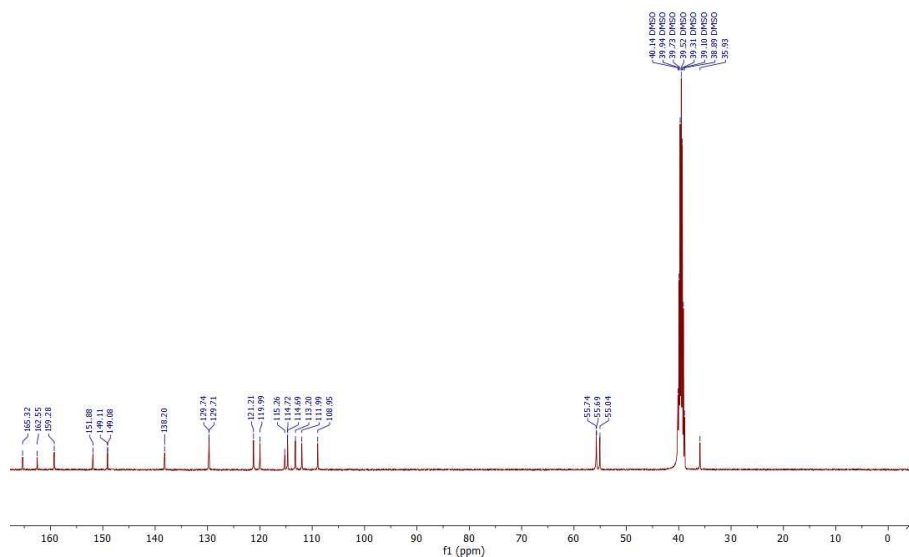

**Figure S18:** FT-IR, <sup>1</sup>H-, and <sup>13</sup>C-NMR spectra of compound **7f**.

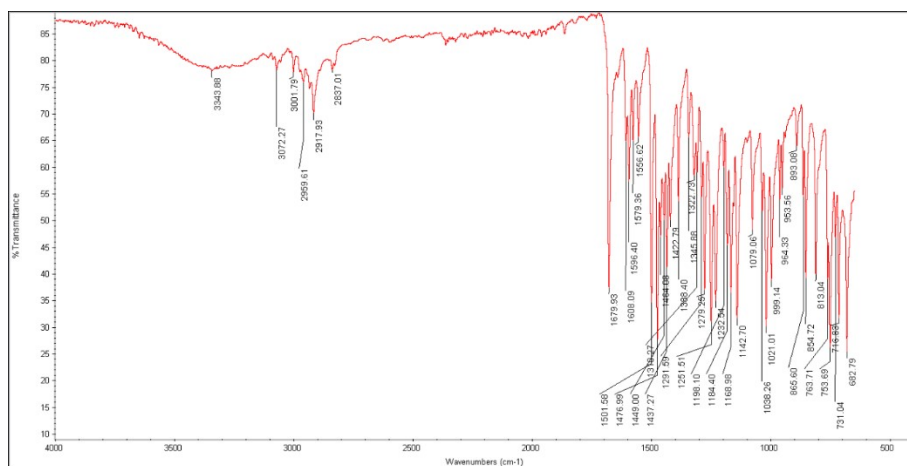

FBO-15 H-NMR.1.fid  
FBO-15 H-NMR

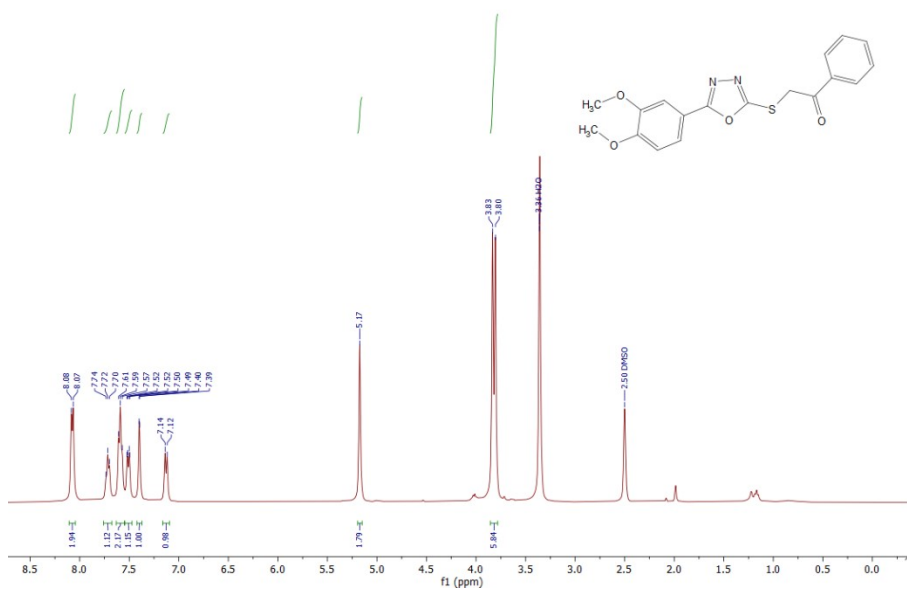

FBO-15 C-13.1.fid  
FBO-15 C-13

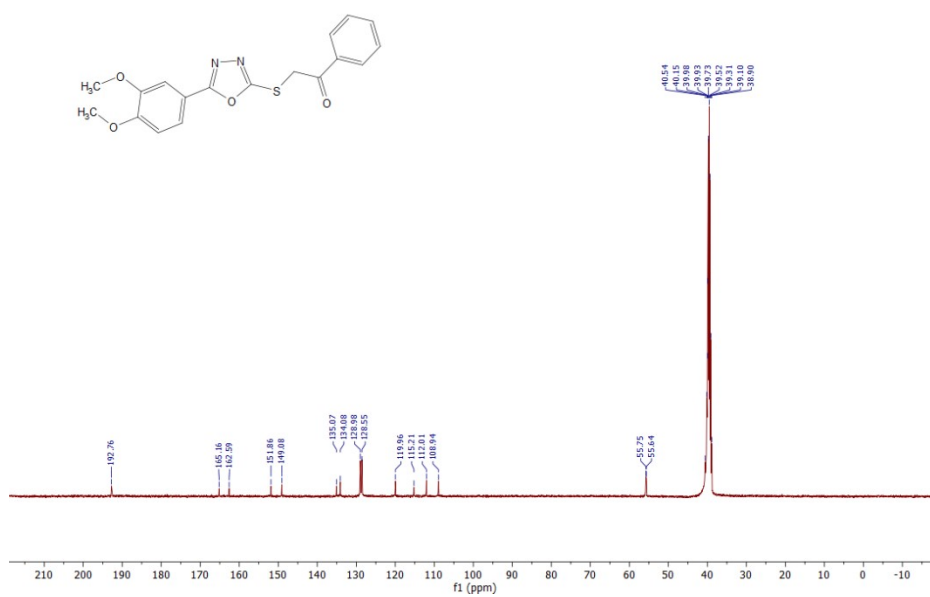

Figure S19: FT-IR, <sup>1</sup>H-, and <sup>13</sup>C-NMR spectra of compound 7g.
